# Supplementary material for: The Mycobacterium tuberculosis mycothiol S-transferase is divalent metal-dependent for mycothiol binding and transfer
Source: Royal Society of Chemistry journal article supplement (doi:10.1039/d2md00401a), 2023-01-01

## Supporting Information

# The *Mycobacterium tuberculosis* Mycothiol S-transferase enzyme binds mycothiol in a divalent metal-dependent manner

Yahani P. Jayasinghe<sup>1</sup>, Michael T. Banco<sup>2</sup>, Jared J. Lindenberger<sup>2</sup>, Lorenza Favrot<sup>2</sup>, Zuzana Palčková<sup>3</sup>, Mary Jackson<sup>3</sup>, Shino Manabe<sup>4,5</sup>, Donald R. Ronning<sup>1\*</sup>

<sup>1</sup>Department of Pharmaceutical Sciences, College of Pharmacy, University of Nebraska Medical Center, Omaha, Nebraska, United States, 68198-6025.

<sup>2</sup>Department of Chemistry and Biochemistry, University of Toledo, Toledo, Ohio, United States.

<sup>3</sup>Mycobacteria Research Laboratories, Department of Microbiology, Immunology and Pathology, Colorado State University, Fort Collins, Colorado 80523-1682, United States.

<sup>4</sup>Laboratory of Functional Molecule Chemistry, Pharmaceutical Department and Institute of Medicinal Chemistry, Hoshi University, Tokyo, Japan.

<sup>5</sup>Research Center for Pharmaceutical Development, Graduate School of Pharmaceutical Sciences & Faculty of Pharmaceutical Sciences, Tohoku University, Miyagi, Japan.

\*Corresponding author

| Catalytic Metal  | Mean V ( $\mu\text{M}/\text{min}$ ) |
|------------------|-------------------------------------|
| Zn <sup>2+</sup> | 0.65 $\pm$ 0.02                     |
| Co <sup>2+</sup> | 2.73 $\pm$ 0.06                     |
| Fe <sup>2+</sup> | 0.59 $\pm$ 0.01                     |

Table S1 – catalytic rates of MST catalyzed reactions with different metals in the reaction mixture

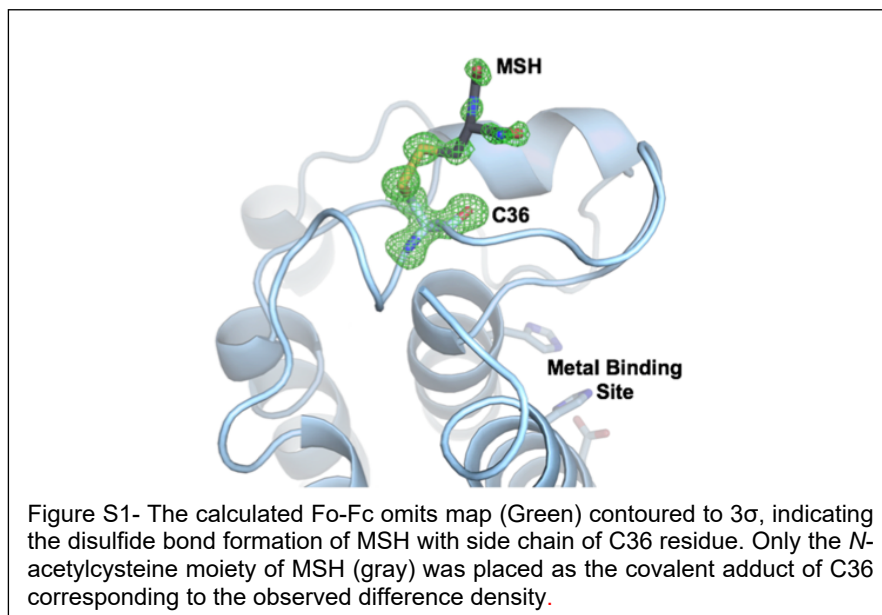

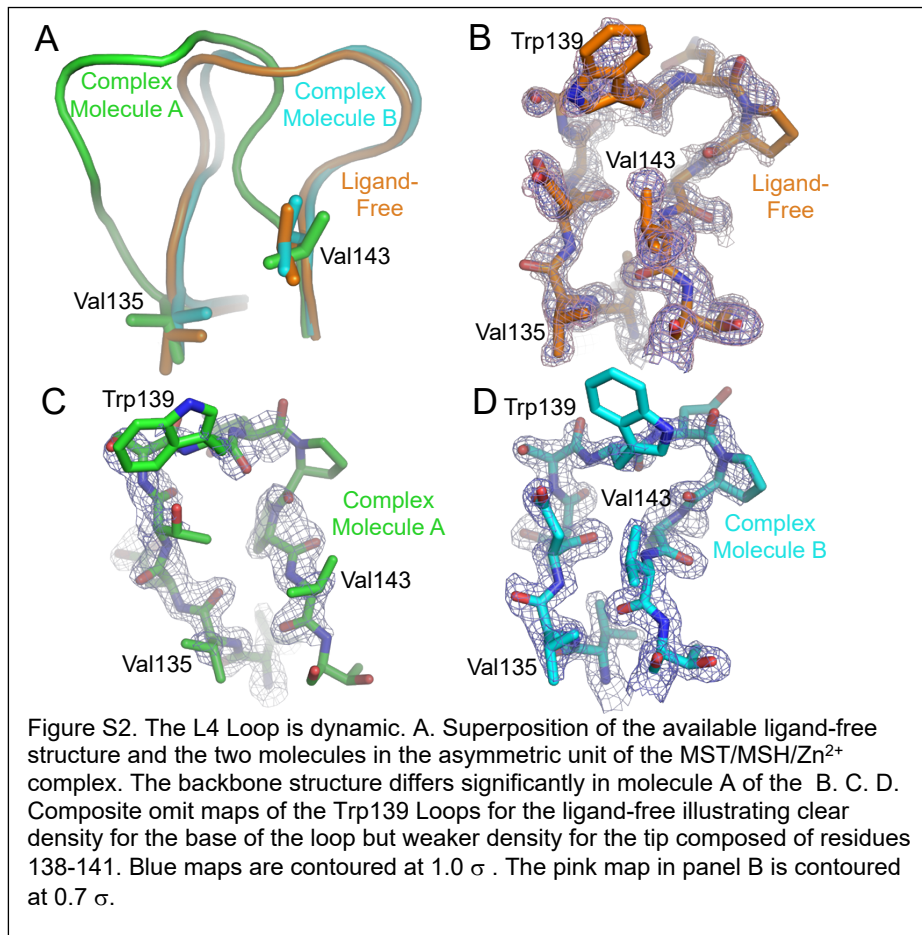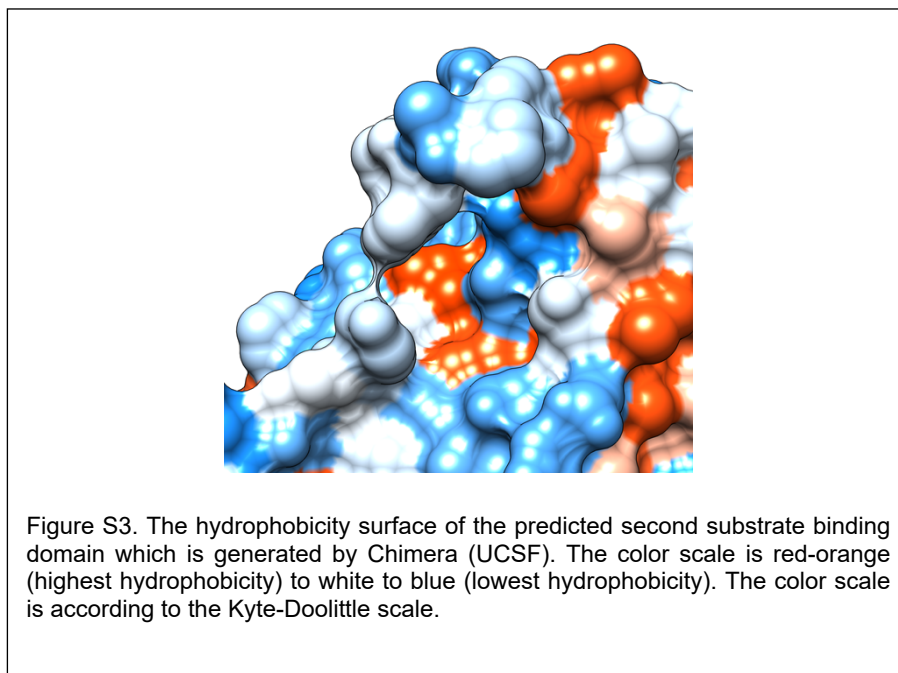

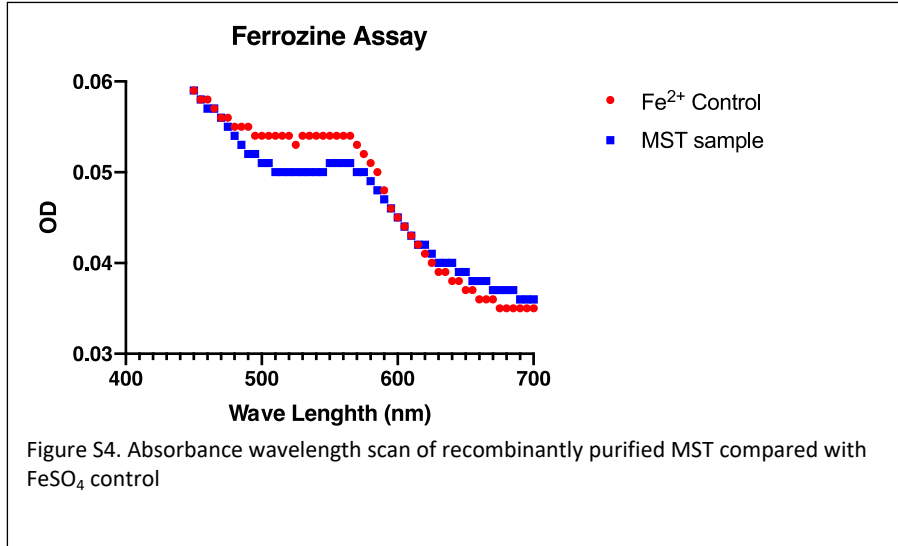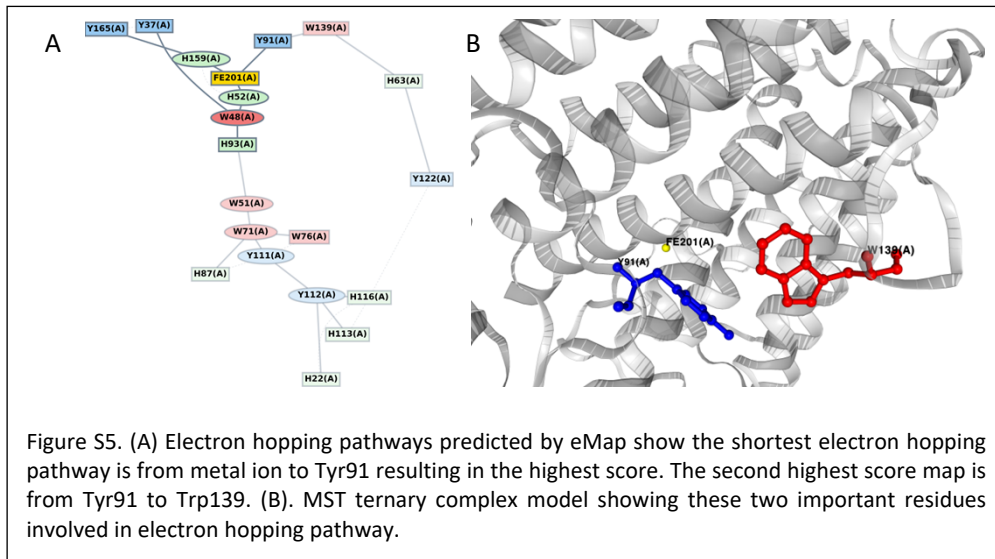

Supplement: d2md00401a1.pdf [file d2md00401a1.pdf]
